# Supplementary material for: Construction of an Immobilized Thermophilic Esterase on Epoxy Support for Poly(ε-caprolactone) Synthesis
Source: MDPI journal article supplement (doi:10.3390/molecules21060796), 2016-06-18
Supplement: s1 [file s1]

# SupplementaryMaterials: Construction of an Immobilized Thermophilic Esterase on Epoxy Support for Poly( $\epsilon$ -caprolactone) Synthesis

Hui Ren, Zhen Xing, Jiebing Yang, Wei Jiang, Gang Zhang, Jun Tang, Quanshun Li

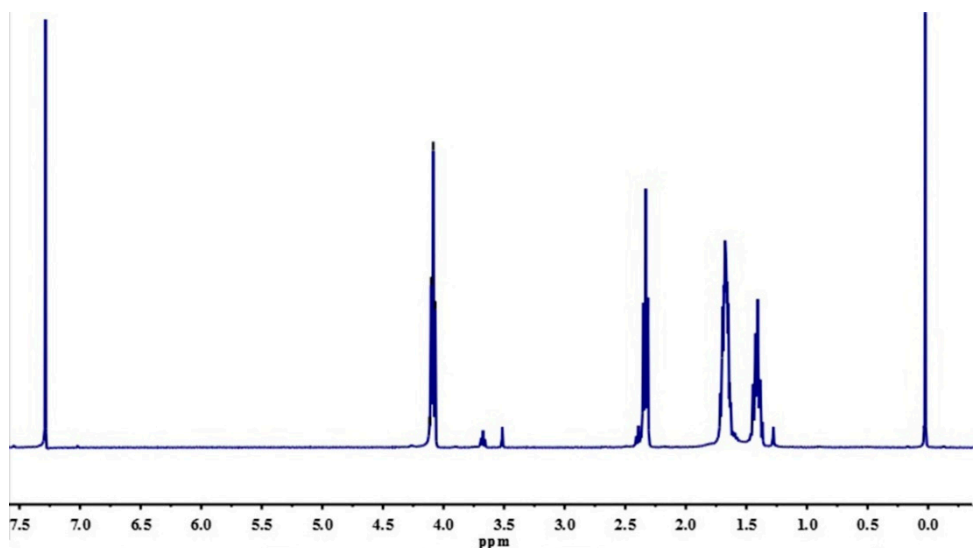

**Figure S1.**  $^1\text{H}$  NMR spectrum of PCL synthesized by the immobilized enzyme EC-EP-AFEST. Reactions were conducted at 80 °C for 72 h, using 5 mL  $\epsilon$ -caprolactone, 15 mL toluene and 2.0 g EC-EP-AFEST.  $^1\text{H}$ -NMR of PCL: 1.39 (m,  $-\text{COCH}_2\text{CH}_2\text{CH}_2-$ ), 1.66 (m,  $-\text{COCH}_2\text{CH}_2\text{CH}_2\text{CH}_2\text{CH}_2\text{O}-$ ), 2.31 (t,  $-\text{COCH}_2-$ ), 4.06 (t,  $-\text{CH}_2\text{O}-$ ) and 3.66 (t,  $-\text{CH}_2\text{OH}$  end group).

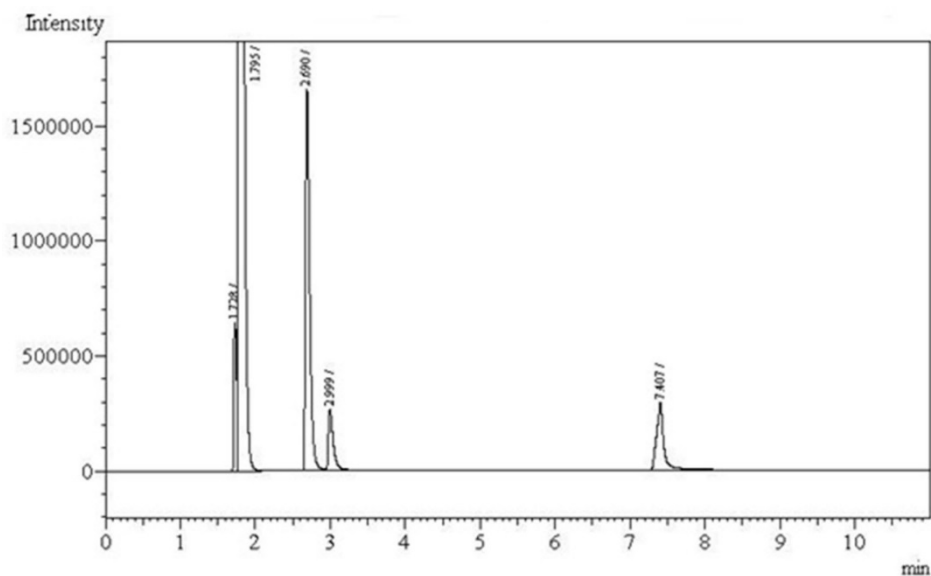

**Figure S2.** Typical GC chromatograph for determining the monomer conversion. The peaks at 1.795, 2.690, 2.999 and 7.47 min represented dichloromethane, toluene, butyl acetate (internal standard) and  $\epsilon$ -caprolactone, respectively.

(A)

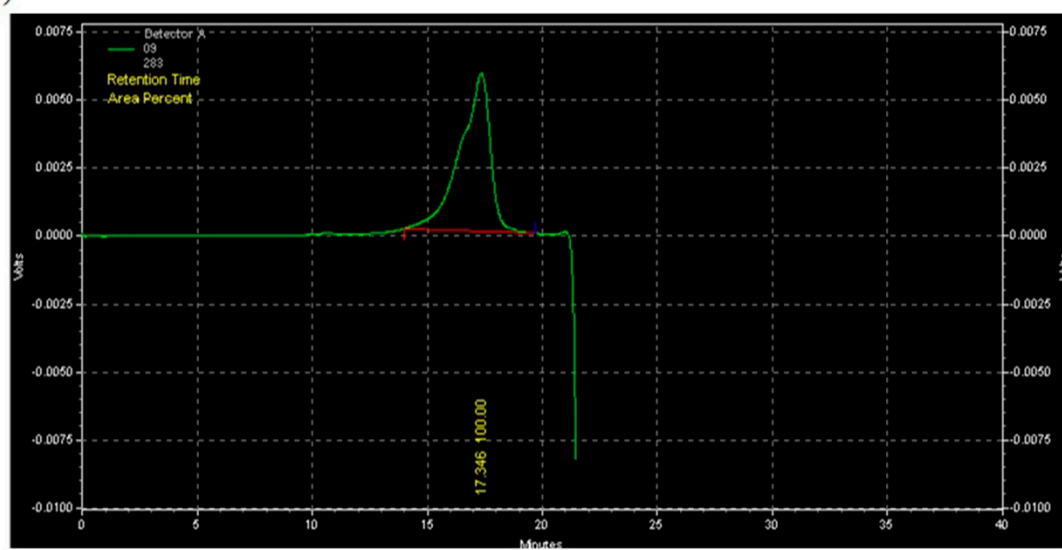

(B)

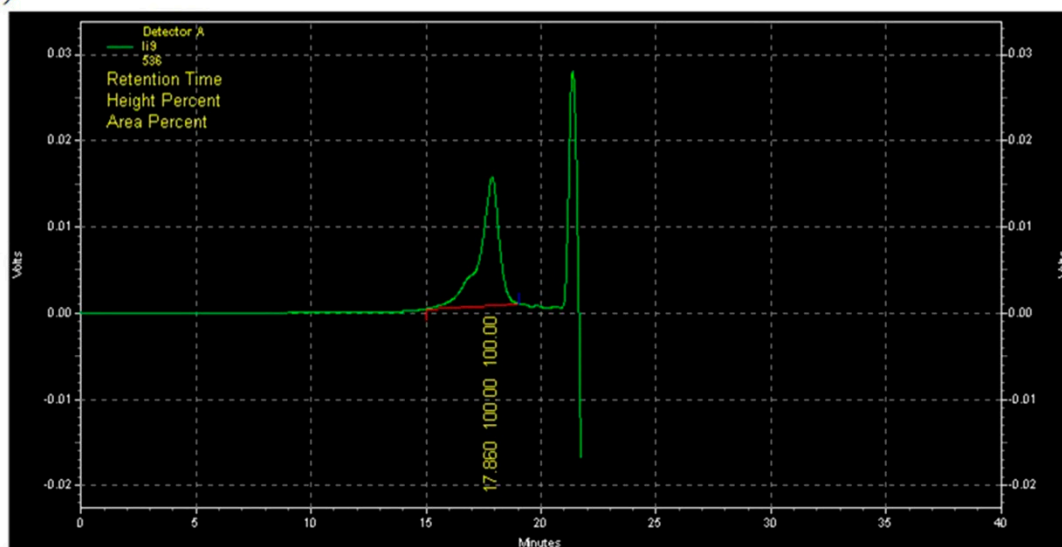

**Figure S3.** Typical GPC chromatograms of polystyrene standard with  $M_n = 2000$  g/mol (A) and PCL synthesized by the immobilized enzyme EC-EP-AFEST (B).
